# Supplementary material for: Multi-Dose Priming Regimens of PfSPZ Vaccine: Safety and Efficacy against Controlled Human Malaria Infection in Equatoguinean Adults
Source: PubMed Central journal article supplement (PMC8991366; doi:10.4269/ajtmh.21-0942), 2022-02-07
Supplement: tpmd210942.SD1.pdf [file tpmd210942.SD1.pdf]

**Supplemental Table 1: Demographics**

|             |                     | <b>Group 1(9.0x10<sup>5</sup><br/>- Day 1, 3, 5, 7,<br/>113)</b> |                          | <b>Group 2(9.0x10<sup>5</sup><br/>- Day 1, 3, 5, 7)</b> |                          | <b>Group 3(9.0x10<sup>5</sup><br/>- Day 1, 3, 5, 7, 29)</b> |                          | <b>Group 4(9.0x10<sup>5</sup><br/>- Day 1, 8, 29)</b> |                          |
|-------------|---------------------|------------------------------------------------------------------|--------------------------|---------------------------------------------------------|--------------------------|-------------------------------------------------------------|--------------------------|-------------------------------------------------------|--------------------------|
|             |                     | <b>Vaccine<br/>(N=21)</b>                                        | <b>Placebo<br/>(N=5)</b> | <b>Vaccine<br/>(N=21)</b>                               | <b>Placebo<br/>(N=5)</b> | <b>Vaccine<br/>(N=21)</b>                                   | <b>Placebo<br/>(N=5)</b> | <b>Vaccine<br/>(N=21)</b>                             | <b>Placebo<br/>(N=5)</b> |
| Sex – n (%) | Male                | 21 (100)                                                         | 5 (100)                  | 17 (81)                                                 | 5 (100)                  | 18 (86)                                                     | 5 (100)                  | 15 (71%)                                              | 5 (100%)                 |
|             | Female              |                                                                  |                          | 4 (19)                                                  |                          | 3 (14)                                                      |                          | 6 (29%)                                               | 0                        |
| Age         | Mean (SD)           | 23.3<br>(2.47)                                                   | 25.2<br>(1.92)           | 21.9<br>(2.85)                                          | 22.0<br>(5.83)           | 23.9<br>(3.46)                                              | 20.6<br>(2.07)           | 25.0<br>(3.36)                                        | 24.2<br>(1.30)           |
|             | Median              | 23                                                               | 25                       | 21                                                      | 20                       | 24                                                          | 21                       | 26                                                    | 24                       |
|             | Minimum,<br>Maximum | 18,30                                                            | 23,28                    | 18,26                                                   | 18,32                    | 18,31                                                       | 18,23                    | 19,30                                                 | 23,26                    |
| Height (cm) | Mean (SD)           | 168 (6.31)                                                       | 164 (3.05)               | 167 (5.78)                                              | 169 (6.58)               | 167 (5.58)                                                  | 172 (7.44)               | 168 (8.66)                                            | 172 (3.63)               |
|             | Median              | 168                                                              | 163                      | 167                                                     | 168                      | 167                                                         | 171                      | 166                                                   | 172                      |
|             | Minimum,<br>Maximum | 156,180                                                          | 160,168                  | 156,179                                                 | 161,177                  | 156,179                                                     | 162,181                  | 153,181                                               | 166,176                  |
| Weight (kg) | Mean (SD)           | 66.2 (10)                                                        | 65.4 (4.5)               | 64.5 (8.0)                                              | 66.6 (10)                | 63.6 (8.3)                                                  | 71.8 (7.8)               | 64.3 (9.0)                                            | 68.1 (7.0)               |
|             | Median              | 63.2                                                             | 67.5                     | 64.8                                                    | 71                       | 62                                                          | 73                       | 65                                                    | 66                       |
|             | Minimum,<br>Maximum | 48.2,91.7                                                        | 60.2,70.5                | 49,79                                                   | 56,79                    | 51.5,86                                                     | 60,80.6                  | 50.7,82                                               | 59,76.2                  |
| BMI         | Mean (SD)           | 23.2<br>(2.55)                                                   | 24.4<br>(2.41)           | 23.0<br>(2.32)                                          | 23.2<br>(2.39)           | 22.9<br>(2.43)                                              | 24.0<br>(1.00)           | 22.7<br>(2.67)                                        | 23.2<br>(2.17)           |
|             | Median              | 23                                                               | 25                       | 23                                                      | 23                       | 23                                                          | 24                       | 23                                                    | 24                       |
|             | Minimum,<br>Maximum | 19,28                                                            | 21,27                    | 18,26                                                   | 20,26                    | 18,30                                                       | 23,25                    | 19,29                                                 | 20,25                    |

**Supplemental Table 2: Asymptomatic parasitemia during the study prior to CHMI detected retrospectively by qPCR\*.**

| Group | Vaccine or placebo | Vaccination Visit           | Parasite density (copies/ $\mu$ L) | TBS results - CHMI | qPCR results - CHMI |
|-------|--------------------|-----------------------------|------------------------------------|--------------------|---------------------|
| 1     | PfSPZ              | 1 day prior to V1           | 1.31                               | negative           | negative            |
| 3     | NS                 | 1 day prior to V5           | 16.31                              | negative           | negative            |
| 3     | NS                 | 1 day prior to V1           | 1.84                               | negative           | negative            |
| 3     | NS                 | 1 day prior to V5           | 227.4                              | negative           | negative            |
| 4     | NS                 | 1 day prior to planned V3** | 6740                               | negative           | Positive day 20     |
| 4     | PfSPZ              | 1 day prior to V3           | 0.39                               | negative           | negative            |
| 4     | PfSPZ              | 7 days prior to V3          | 0.70                               | negative           | negative            |

\*All subjects were treated as per protocol prior to V1 and prior to CHMI, none specifically for qPCR positivity.

\*\* This subject was the only subject who was TBS + (709 Pf/ $\mu$ L). This subject did receive treatment and therefore V3 was delayed by 20 days after planned date, with CHMI 6 weeks later.

Notes: The five subjects positive at screening are not included in the table as all subjects received AL prior to immunization (see manuscript text); qPCR samples from all other timepoints including the pre-CHMI timepoint were negative for these seven subjects.

**Supplemental Table 3. Antibodies to PfCSP, PfMSP1 and PfEXP1. Out-of-range values are reported as 1.**

| Group                                                                                                                                                                                          | Volunteer ID | Infection  | PfCSP IgG ELISA |        |        |          |       |        |        |        |       | PfMSP1  | PfEXP1 |       |
|------------------------------------------------------------------------------------------------------------------------------------------------------------------------------------------------|--------------|------------|-----------------|--------|--------|----------|-------|--------|--------|--------|-------|---------|--------|-------|
|                                                                                                                                                                                                |              |            | V1-1            | V4+14  | Net    | Ratio    | V5+14 | Net    | Ratio  | CHMI-7 | Net   |         |        | Ratio |
| <b>Group 1: 9.0x10<sup>5</sup> PfSPZ administered four times on Days 1, 3, 5 and 7 (0, +2, +4, +6 days) as a prime, followed by a boost of 9.0x10<sup>5</sup> PfSPZ on Day 113 (+16 weeks)</b> | ANN-001      | Uninfected | 1538            | 3063   | 1525   | 1.99     | 21804 | 20266  | 14.18  | 22183  | 20645 | 14.42   | 267    | 324   |
|                                                                                                                                                                                                | GAO-007      | Uninfected | 1109            | 17114  | 16005  | 15.43    | 5757  | 4648   | 5.19   | 8136   | 7027  | 7.34    | 3636   | 311   |
|                                                                                                                                                                                                | FMS-011      | Uninfected | 223             | 1570   | 1347   | 7.04     | 772   | 549    | 3.46   | 543    | 320   | 2.43    | 450    | 383   |
|                                                                                                                                                                                                | DMM-013      | Uninfected | 566             | 74251  | 73685  | 131.19   | 31773 | 31207  | 56.14  | 29029  | 28463 | 51.29   | 2648   | 1234  |
|                                                                                                                                                                                                | SNB-017      | Uninfected | 1219            | 6388   | 5169   | 5.24     | 3030  | 1811   | 2.49   | 4058   | 2839  | 3.33    | 2336   | 3234  |
|                                                                                                                                                                                                | JMA-015      | Uninfected | 56              | 13115  | 13059  | 234.20   | 2887  | 2831   | 51.55  | 1782   | 1726  | 31.82   | 64     | 189   |
|                                                                                                                                                                                                | FEN-028      | Uninfected | 852             | 3422   | 2570   | 4.02     | 2097  | 1245   | 2.46   | 1667   | 815   | 1.96    | 1003   | 1037  |
|                                                                                                                                                                                                | JOA-019      | Uninfected | 344             | 1273   | 929    | 3.70     | 557   | 213    | 1.62   | 619    | 275   | 1.80    | 498    | 567   |
|                                                                                                                                                                                                | MMM-032      | Uninfected | 138             | 1635   | 1497   | 11.85    | 1625  | 1487   | 11.78  | 1168   | 1030  | 8.46    | 1942   | 1684  |
|                                                                                                                                                                                                | 004          | Uninfected | 177             | 40506  | 40329  | 228.85   | 3588  | 3411   | 20.27  | 4532   | 4355  | 25.60   | 114    | 386   |
|                                                                                                                                                                                                | NMA-027      | Infected   | 382             | 7529   | 7147   | 19.71    | 2279  | 1897   | 5.97   | 1340   | 958   | 3.51    | 1418   | 848   |
|                                                                                                                                                                                                | LEE-024      | Infected   | 212             | 40317  | 40105  | 190.17   | 9703  | 9491   | 45.77  | 8480   | 8268  | 40.00   | 287    | 398   |
|                                                                                                                                                                                                | JOM-025      | Infected   | 91              | 8050   | 7959   | 88.46    | 2856  | 2765   | 31.38  | 1674   | 1583  | 18.40   | 961    | 209   |
|                                                                                                                                                                                                | ROB-018      | Infected   | 25              | 22537  | 22512  | 901.48   | 8994  | 8969   | 359.76 | 7390   | 7365  | 295.60  | 281    | 2204  |
|                                                                                                                                                                                                | MSE-021      | Infected   | 410             | 22233  | 21823  | 54.23    | 3240  | 2830   | 7.90   | 2965   | 2555  | 7.23    | 21     | 71    |
| SNB-023                                                                                                                                                                                        | Infected     | 113        | 63810           | 63697  | 564.69 | 15645    | 15532 | 138.45 | 7800   | 7687   | 69.03 | 1       | 19     |       |
| ESB-034                                                                                                                                                                                        | Infected     | 534        | 14499           | 13965  | 27.15  | 6329     | 5795  | 11.85  | 3512   | 2978   | 6.58  | 2233    | 219    |       |
| <b>Group 1: Normal Saline Placebo</b>                                                                                                                                                          | NEN-31       | Uninfected | NS              | 556    | 555    | 555.00   | 737   | 736    | 737.00 | 346    | 345   | 346.00  | 3625   | 8545  |
|                                                                                                                                                                                                | EEN-014      | Uninfected | 738             | 626    | 1      | 0.85     | 362   | 1      | 1.00   | 428    | 1     | 1.00    | 1817   | 5641  |
|                                                                                                                                                                                                | RBM-030      | Infected   | 774             | NS     | NS     | NS       | 285   | 1      | 1.00   | 439    | 1     | 1.00    | 1716   | 1665  |
|                                                                                                                                                                                                | COO-002      | Infected   | 667             | 383    | 1      | 0.57     | 212   | 1      | 1.00   | 207    | 1     | 1.00    | 240    | 213   |
|                                                                                                                                                                                                | JBC-010      | Infected   | 80              | 61     | 1      | 0.76     | NS    | NS     | NS     | 95     | 15    | 1.19    | 12050  | 310   |
| <b>Group 2: 9.0x10<sup>5</sup> PfSPZ administered four times on Days 1, 3, 5 and 7 (0, +2, +4, +6 days) as a prime, without a boost</b>                                                        | MNC-040      | Uninfected | 516             | 131469 | 130953 | 254.78   | N/A   |        |        | 29458  | 28942 | 57.09   | 2424   | 2350  |
|                                                                                                                                                                                                | JOE-051      | Uninfected | 217             | 5493   | 5276   | 25.31    |       |        |        | 4692   | 4475  | 21.62   | 1032   | 729   |
|                                                                                                                                                                                                | PPT-047      | Uninfected | 14              | 49434  | 49420  | 3531.00  |       |        |        | 6898   | 6884  | 492.71  | 205    | 18    |
|                                                                                                                                                                                                | MBA-062      | Uninfected | 982             | 7146   | 6164   | 7.28     |       |        |        | 24851  | 23869 | 25.31   | 878    | 794   |
|                                                                                                                                                                                                | OCB-065      | Uninfected | 20              | 9360   | 9340   | 468.00   |       |        |        | 4214   | 4194  | 210.70  | 1      | 1     |
|                                                                                                                                                                                                | VAO-072      | Uninfected | 580             | 15201  | 14621  | 26.21    |       |        |        | 7515   | 6935  | 12.96   | 320    | 30751 |
|                                                                                                                                                                                                | CBN-082      | Uninfected | 91              | 7170   | 7079   | 78.79    |       |        |        | 12728  | 12637 | 139.87  | 59     | 2896  |
|                                                                                                                                                                                                | MNN-060      | Uninfected | 1686            | 9050   | 7364   | 5.37     |       |        |        | 24962  | 23276 | 14.81   | 2090   | 524   |
|                                                                                                                                                                                                | ROA-099      | Uninfected | 734             | 18886  | 18152  | 25.73    |       |        |        | 2348   | 1614  | 3.20    | 38848  | 4348  |
|                                                                                                                                                                                                | AMM-097      | Uninfected | 1271            | 33995  | 32724  | 26.75    |       |        |        | 10347  | 9076  | 8.14    | 1595   | 1845  |
|                                                                                                                                                                                                | BST-102      | Uninfected | 235             | 803    | 568    | 3.42     |       |        |        | 1066   | 831   | 4.54    | 6252   | 2394  |
|                                                                                                                                                                                                | ANA-043      | Infected   | 10              | 3440   | 3430   | 344.00   |       |        |        | 6747   | 6737  | 674.70  | 326    | 55    |
|                                                                                                                                                                                                | REC-057      | Infected   | 1126            | 13414  | 12288  | 11.91    |       |        |        | 9003   | 7877  | 8.00    | 153    | 1     |
|                                                                                                                                                                                                | JSB-038      | Infected   | 1               | 18857  | 18856  | 18857.00 |       |        |        | 2461   | 2460  | 2461.00 | 1      | 103   |

| Group                                                                                                                                                                                   | Volunteer ID | Infection  | PfCSP IgG ELISA |        |        |          |       |        |        |        |       | PfMSP1  | PfEXP1 |       |        |      |      |
|-----------------------------------------------------------------------------------------------------------------------------------------------------------------------------------------|--------------|------------|-----------------|--------|--------|----------|-------|--------|--------|--------|-------|---------|--------|-------|--------|------|------|
|                                                                                                                                                                                         |              |            | V1-1            | V4+14  | Net    | Ratio    | V5+14 | Net    | Ratio  | CHMI-7 | Net   |         |        | Ratio |        |      |      |
|                                                                                                                                                                                         | EEN-039      | Infected   | 673             | 57640  | 56967  | 85.65    |       |        |        | 32181  | 31508 | 47.82   | 70     | 59    |        |      |      |
|                                                                                                                                                                                         | BRB-073      | Infected   | 77              | 16279  | 16202  | 211.42   |       |        |        | 9442   | 9365  | 122.62  | 1      | 81    |        |      |      |
|                                                                                                                                                                                         | JPL-066      | Infected   | 1               | 73379  | 73378  | 73379.00 |       |        |        | 4085   | 4084  | 4085.00 | 1      | 134   |        |      |      |
|                                                                                                                                                                                         | EBB-067      | Infected   | 187             | 3844   | 3657   | 20.56    |       |        |        | 2169   | 1982  | 11.60   | 227    | 592   |        |      |      |
|                                                                                                                                                                                         | RFM-035      | Infected   | 1               | 55663  | 55662  | 55663.00 |       |        |        | 5561   | 5560  | 5561.00 | 7831   | 250   |        |      |      |
|                                                                                                                                                                                         | RNO-090      | Infected   | 3687            | 9595   | 5908   | 2.60     |       |        |        | 19765  | 16078 | 5.36    | 1941   | 1600  |        |      |      |
|                                                                                                                                                                                         | DLB-053      | Infected   | 1               | 46399  | 46398  | 46399.00 |       |        |        | 5890   | 5889  | 5890.00 | 40     | 67    |        |      |      |
| Group 2: Normal Saline Placebo                                                                                                                                                          | MBJ-050      | Infected   | 185             | 187    | 2      | 1.01     |       |        |        | 32     | 1     | 1.00    | 133    | 141   |        |      |      |
|                                                                                                                                                                                         | PNN-084      | Infected   | 1437            | 323    | 1      | 1.00     |       |        |        | 427    | 1     | 1.00    | 822    | 1360  |        |      |      |
|                                                                                                                                                                                         | OEI-077      | Infected   | 49              | 104    | 55     | 2.12     |       |        |        | 262    | 213   | 5.35    | 447    | 195   |        |      |      |
|                                                                                                                                                                                         | SOO-096      | Infected   | 1               | 129    | 128    | 129.00   |       |        |        | 32     | 31    | 32.00   | 43     | 149   |        |      |      |
| Group 3: 9.0x10 <sup>5</sup> PfSPZ administered four times on Days 1, 3, 5 and 7 (0, +2, +4, +6 days) as a prime, followed by a boost of 9.0x10 <sup>5</sup> PfSPZ on Day 29 (+4 weeks) | MOB-058      | Uninfected | 130             | 158933 | 158803 | 1222.56  |       |        |        | 43096  | 42966 | 331.51  | 24910  | 24780 | 191.62 | 886  | 329  |
|                                                                                                                                                                                         | ENM-125      | Uninfected | 892             | 6210   | 5318   | 6.96     |       |        |        | 6131   | 5239  | 6.87    | 5203   | 4311  | 5.83   | 5747 | 1050 |
|                                                                                                                                                                                         | CMM-116      | Uninfected | 186             | 8160   | 7974   | 43.87    |       |        |        | 3581   | 3395  | 19.25   | 2582   | 2396  | 13.88  | 1225 | 811  |
|                                                                                                                                                                                         | DNO-126      | Uninfected | 431             | 5546   | 5115   | 12.87    | 3667  | 3236   | 8.51   | 4296   | 3865  | 9.97    | 1299   | 611   |        |      |      |
|                                                                                                                                                                                         | MAE-137      | Uninfected | 172             | 30353  | 30181  | 176.47   | 16639 | 16467  | 96.74  | 14219  | 14047 | 82.67   | 154    | 25    |        |      |      |
|                                                                                                                                                                                         | PNA-118      | Uninfected | 15996           | 33779  | 17783  | 2.11     | 23307 | 7311   | 1.46   | 13044  | -2952 | 0.82    | 167267 | 41545 |        |      |      |
|                                                                                                                                                                                         | FNN-136      | Uninfected | 637             | 47537  | 46900  | 74.63    | 26003 | 25366  | 40.82  | 27290  | 26653 | 42.84   | 590    | 5945  |        |      |      |
|                                                                                                                                                                                         | AMN-120      | Uninfected | 1512            | 35161  | 33649  | 23.25    | 26711 | 25199  | 17.67  | 22628  | 21116 | 14.97   | 1765   | 11722 |        |      |      |
|                                                                                                                                                                                         | AEB-141      | Uninfected | 491             | 6657   | 6166   | 13.56    | 6648  | 6157   | 13.54  | 6133   | 5642  | 12.49   | 332    | 153   |        |      |      |
|                                                                                                                                                                                         | PNA-119      | Infected   | 3843            | 16909  | 13066  | 4.40     | 9806  | 5963   | 2.55   | 5770   | 1927  | 1.50    | 12168  | 4556  |        |      |      |
|                                                                                                                                                                                         | VBM-129      | Infected   | 2201            | 13755  | 11554  | 6.25     | 10636 | 8435   | 4.83   | 6977   | 4776  | 3.17    | 102    | 904   |        |      |      |
|                                                                                                                                                                                         | JNN-117      | Infected   | 704             | 7629   | 6925   | 10.84    | 4723  | 4019   | 6.71   | 3238   | 2534  | 4.60    | 722    | 1074  |        |      |      |
|                                                                                                                                                                                         | ALB-130      | Infected   | 109             | 15098  | 14989  | 138.51   | 15374 | 15265  | 141.05 | 10945  | 10836 | 100.41  | 127    | 1777  |        |      |      |
|                                                                                                                                                                                         | TNN-135      | Infected   | 680             | 19341  | 18661  | 28.44    | 13510 | 12830  | 19.87  | 8988   | 8308  | 13.22   | 1127   | 11147 |        |      |      |
|                                                                                                                                                                                         | POB-063      | Infected   | 109             | 57184  | 57075  | 524.62   | 30997 | 30888  | 284.38 | 17364  | 17255 | 159.30  | 78     | 1     |        |      |      |
|                                                                                                                                                                                         | OMA-114      | Infected   | 323             | 11736  | 11413  | 36.33    | 7342  | 7019   | 22.73  | 4749   | 4426  | 14.70   | 52     | 267   |        |      |      |
|                                                                                                                                                                                         | MBM-055      | Infected   | 71              | 12158  | 12087  | 171.24   | 6575  | 6504   | 92.61  | 5964   | 5893  | 84.00   | 419    | 54    |        |      |      |
|                                                                                                                                                                                         | JSB-109      | Infected   | 510             | 6524   | 6014   | 12.79    | 8458  | 7948   | 16.58  | 10849  | 10339 | 21.27   | 2895   | 193   |        |      |      |
| CBE-122                                                                                                                                                                                 | Infected     | 249        | 50288           | 50039  | 201.96 | 26193    | 25944 | 105.19 | 23328  | 23079  | 93.69 | 692     | 1204   |       |        |      |      |
| JPL-138                                                                                                                                                                                 | Infected     | 286        | 29755           | 29469  | 104.04 | 18887    | 18601 | 66.04  | 11222  | 10936  | 39.24 | 7       | 669    |       |        |      |      |
| Group 3: Normal Saline Placebo                                                                                                                                                          | JAE-134      | Infected   | 401             | 406    | 5      | 1.01     | 874   | 473    | 2.18   | 839    | 438   | 2.09    | 14645  | 3966  |        |      |      |
|                                                                                                                                                                                         | FEN-104      | Infected   | 509             | 380    | 1      | 1.00     | 375   | 1      | 1.00   | 345    | 1     | 1.00    | 1017   | 1954  |        |      |      |
|                                                                                                                                                                                         | ANN-016      | Infected   | 156             | 136    | 1      | 1.00     | 88    | 1      | 1.00   | 138    | 1     | 1.00    | 2155   | 1223  |        |      |      |
|                                                                                                                                                                                         | ANB-128      | Uninfected | 521             | 320    | 1      | 1.00     | 324   | 1      | 1.00   | 210    | 1     | 1.00    | 349    | 87    |        |      |      |
| Group 4: 9.0x10 <sup>5</sup> PfSPZ administered two times on Days 1 and 8 (0, +7 days) as a                                                                                             | ABB-106      | Uninfected | 83              | 128    | 45     | 1.54     | 46    | 1      | 1.00   | 124    | 41    | 1.49    | 212    | 456   |        |      |      |
|                                                                                                                                                                                         | MAM-069      | Uninfected | 222             | 4184   | 3962   | 18.85    | N/A   |        |        | 528    | 306   | 2.38    | 1950   | 736   |        |      |      |
|                                                                                                                                                                                         | RMA-146      | Uninfected | 179             | 14748  | 14569  | 82.39    |       |        |        | 3642   | 3463  | 20.35   | 520    | 468   |        |      |      |
|                                                                                                                                                                                         | ANA-166      | Uninfected | 269             | 4807   | 4538   | 17.87    |       |        |        | 5268   | 4999  | 19.58   | 5424   | 2641  |        |      |      |
| VAB-150                                                                                                                                                                                 | Uninfected   | 354        | 7795            | 7441   | 22.02  | 7945     |       |        |        | 7591   | 22.44 | 838     | 1502   |       |        |      |      |

| Group                                                                        | Volunteer ID                   | Infection  | PfcSP IgG ELISA |       |       |         |       |     |       |        |        | PfMSP1 | PfEXP1   |       |       |
|------------------------------------------------------------------------------|--------------------------------|------------|-----------------|-------|-------|---------|-------|-----|-------|--------|--------|--------|----------|-------|-------|
|                                                                              |                                |            | V1-1            | V4+14 | Net   | Ratio   | V5+14 | Net | Ratio | CHMI-7 | Net    |        |          | Ratio |       |
| prime, followed by a boost of 9.0x10 <sup>5</sup> PfsPZ on Day 29 (+4 weeks) | EOM-078                        | Uninfected | 829             | 3347  | 2518  | 4.04    |       |     |       |        | 4551   | 3722   | 5.49     | 1077  | 886   |
|                                                                              | REA-173                        | Uninfected | 1492            | 13932 | 12440 | 9.34    |       |     |       |        | 28259  | 26767  | 18.94    | 468   | 15981 |
|                                                                              | AMM-157                        | Uninfected | 1179            | 2830  | 1651  | 2.40    |       |     |       |        | 4300   | 3121   | 3.65     | 238   | 2930  |
|                                                                              | MEM-076                        | Uninfected | 63              | 47133 | 47070 | 748.14  |       |     |       |        | 32717  | 32654  | 519.32   | 1     | 68    |
|                                                                              | SAO-154                        | Uninfected | 288             | 4336  | 4048  | 15.06   |       |     |       |        | 4013   | 3725   | 13.93    | 9537  | 563   |
|                                                                              | MNC-070                        | Uninfected | 255             | 32711 | 32456 | 128.28  |       |     |       |        | 18864  | 18609  | 73.98    | 1     | 159   |
|                                                                              | DLM-071                        | Uninfected | 203             | 17784 | 17581 | 87.61   |       |     |       |        | 9184   | 8981   | 45.24    | 167   | 160   |
|                                                                              | JON-151                        | Uninfected | 337             | 965   | 628   | 2.86    |       |     |       |        | 2879   | 2542   | 8.54     | 13213 | 8321  |
|                                                                              | AOM-107                        | Uninfected | 530             | 6372  | 5842  | 12.02   |       |     |       |        | 107697 | 107167 | 203.20   | 58001 | 24381 |
|                                                                              | BNN-101                        | Uninfected | 337             | 42854 | 42517 | 127.16  |       |     |       |        | 2546   | 2209   | 7.55     | 15791 | 4468  |
|                                                                              | RON-158                        | Infected   | 209             | 21467 | 21258 | 102.71  |       |     |       |        | 13547  | 13338  | 64.82    | 48    | 433   |
|                                                                              | RSS-091                        | Infected   | 22              | 20803 | 20781 | 945.59  |       |     |       |        | 16547  | 16525  | 752.14   | 1     | 19    |
|                                                                              | EMS-171                        | Infected   | 137             | 14985 | 14848 | 109.38  |       |     |       |        | 16021  | 15884  | 116.94   | 1394  | 2580  |
|                                                                              | JAO-148                        | Infected   | 447             | 4189  | 3742  | 9.37    |       |     |       |        | 1079   | 632    | 2.41     | 2124  | 1389  |
|                                                                              | PNM-161                        | Infected   | 179             | 3996  | 3817  | 22.32   |       |     |       |        | 10685  | 10506  | 59.69    | 1126  | 963   |
|                                                                              | DRB-080                        | Infected   | 1               | 5560  | 5559  | 5560.00 |       |     |       |        | 17151  | 17150  | 17151.00 | 947   | 350   |
|                                                                              | VAM-168                        | Infected   | 50              | 2699  | 2649  | 53.98   |       |     |       |        | 864    | 814    | 17.28    | 88    | 72    |
|                                                                              | Group 4: Normal Saline Placebo | AAM-162    | Uninfected      | 207   | 965   | 758     | 4.66  |     |       |        |        | 229    | 22       | 1.11  | 938   |
| SEA-163                                                                      |                                | Infected   | 89              | 206   | 117   | 2.31    |       |     |       |        | 87     | 1      | 1.00     | 263   | 1715  |
| PMA-149                                                                      |                                | Infected   | 960             | 104   | 1     | 1.00    |       |     |       |        | 454    | 1      | 1.00     | 2976  | 644   |
| AON-139                                                                      |                                | Infected   | 1651            | 524   | 1     | 1.00    |       |     |       |        | 2135   | 484    | 1.29     | 153   | 1242  |
| BEO-155                                                                      |                                | Infected   | 412             | 1287  | 875   | 3.12    |       |     |       |        | 661    | 249    | 1.60     | 6288  | 905   |

NS: No samples available

#### **Supplemental Table 4: Inclusion Criteria**

1. Healthy males and non-pregnant/non-lactating females, age 18 to 45 years at time of enrollment.
2. Provision of signed and dated informed consent form.
3. Demonstrate understanding of the study by responding correctly to 10 out of 10 true/false statements about the trial (a maximum of two additional attempts will be granted for those who fail to respond correctly to all true/false statements in their first attempt).
4. Stated availability and willingness to comply with all study procedures and visits for the duration of the trial, including the required vaccination and post-CHMI ward observation period.
5. Able to understand and communicate in Spanish, the national language of Equatorial Guinea
6. Be in good general health as evidenced by medical history, screening physical examination and laboratory findings.
7. Females of child bearing potential must agree to use injectable medroxyprogesterone for at least 4 weeks prior to enrollment and agree to continue to use medroxyprogesterone during the entire study period.
8. Female subjects must not be pregnant (as demonstrated by a negative urine pregnancy test) at enrollment and prior to each immunization.
9. Body Mass Index (BMI) of 18 to 30 kg/m<sup>2</sup>.
10. At least one year of residence on Bioko Island, Equatorial Guinea, and living close enough to Baney Clinical Research Center and Sampaka Hospital to be able to attend the required appointments at the study center.
11. Agree to release medical information and inform a study doctor about contraindications for participation in the study.
12. Willingness to be attended to by a study doctor and take all medications prescribed during the study period.
13. Agree to provide contact information of a third-party household member or close friend to the study team.
14. Agree not to participate in another clinical trial during the study period.
15. Agree not to donate blood during the study period.
16. Willing to undergo HIV, hepatitis B (HBV) and hepatitis C (HCV) tests.
17. Reachable by telephone for adverse event review.

### **Supplemental Table 5: Exclusion Criteria**

1. Known allergic reactions to components of PfSPZ Vaccine, PfSPZ Challenge, or artemether/lumefantrine (AL).
2. Having received an investigational malaria vaccine in the last 5 years.
3. Having received any non-live vaccine in the 14 days prior to enrollment, any live vaccine in the 28 days prior to enrollment or three or more of any type of vaccine in the four months prior to enrollment.
4. Participation in any other clinical study involving investigational medicinal products including malaria drugs within 30 days prior to enrollment.
5. History of arrhythmias, prolonged QT-interval or other cardiac disease, or clinically significant abnormalities on electrocardiogram (ECG) at screening.
6. History of non-febrile seizures or complex febrile seizures.
7. History of cardiac disease in a 1st or 2nd degree relative when <50 years of age.
8. A chronic illness including diabetes mellitus, cancer, HIV/AIDS, tuberculosis.
9. History of illicit drug or alcohol use that interferes with normal social function.
10. The use of chronic immunosuppressive drugs or other immune modifying drugs within three months of study onset (inhaled and topical corticosteroids are allowed) and during the study period.
11. Any clinically significant deviation from the normal range in biochemistry, hematology or urinalysis tests.
12. Positive HIV, hepatitis B virus or hepatitis C virus serologic tests.
13. Signs and symptoms of tuberculosis (e.g., chronic cough, night sweats, chronic fever, enlarged lymph nodes, unintended weight loss), or risk factors in an otherwise healthy person in combination with a positive tuberculin skin test (TST).
14. Symptoms, physical signs and/or laboratory values suggestive of systemic disorders including renal, hepatic, blood, cardiovascular, pulmonary, skin, immunodeficiency, psychiatric, and other conditions which could interfere with the interpretation of the study results or compromise the health of the volunteer.
15. Any medical, psychiatric, social or occupational condition or situation that, in the judgment of the PI, impairs the volunteer's ability to give informed consent, increases the risk to the volunteer of participation in the study, affects the ability of the volunteer to participate fully in the study, or might negatively impact the quality, consistency or interpretation of data derived from their participation in the study.

**Supplemental Table 6: List of solicited adverse events with the grading system for severity and grading for relatedness.**

|                                                                       |                                                                                                                                                                                                                                                            |   |                                                              |
|-----------------------------------------------------------------------|------------------------------------------------------------------------------------------------------------------------------------------------------------------------------------------------------------------------------------------------------------|---|--------------------------------------------------------------|
| Local solicited adverse events<br><br>(at injection site)             | <ul style="list-style-type: none"> <li>• Pain</li> <li>• Tenderness</li> <li>• Pruritus</li> </ul>                                                                                                                                                         | 1 | Daily activity minimally affected, with or without treatment |
|                                                                       |                                                                                                                                                                                                                                                            | 2 | Daily activity possible but only with treatment              |
|                                                                       |                                                                                                                                                                                                                                                            | 3 | Daily activity not possible even with treatment              |
|                                                                       | <ul style="list-style-type: none"> <li>• Erythema</li> <li>• Swelling</li> <li>• Induration</li> <li>• Bruising/extravasated blood</li> </ul>                                                                                                              | 1 | 2.5 – 5 cm                                                   |
|                                                                       |                                                                                                                                                                                                                                                            | 2 | 5.1 – 10 cm                                                  |
|                                                                       |                                                                                                                                                                                                                                                            | 3 | >10 cm, necrosis or exfoliative dermatitis                   |
| Systemic solicited adverse events<br><br>(Core List-Post Vaccination) | <ul style="list-style-type: none"> <li>• Fever</li> </ul>                                                                                                                                                                                                  | 1 | 38.0°C – 38.4°C                                              |
|                                                                       |                                                                                                                                                                                                                                                            | 2 | 38.5°C – 38.9°C                                              |
|                                                                       |                                                                                                                                                                                                                                                            | 3 | >39.0°C                                                      |
|                                                                       | <ul style="list-style-type: none"> <li>• Allergic reaction (rash, urticaria, pruritus, edema)</li> <li>• Headache</li> <li>• Subjective Fever*</li> <li>• Fatigue</li> <li>• Malaise</li> <li>• Chills</li> <li>• Myalgia</li> <li>• Arthralgia</li> </ul> | 1 | Daily activity minimally affected, with or without treatment |
|                                                                       |                                                                                                                                                                                                                                                            | 2 | Daily activity possible but only with treatment              |
|                                                                       |                                                                                                                                                                                                                                                            | 3 | Daily activity not possible even with treatment              |
| Post CHMI malaria symptoms<br><br>(In addition to Core List)          | <ul style="list-style-type: none"> <li>• Dizziness</li> <li>• Rigors (body shaking shivers)</li> <li>• Sweats</li> <li>• Cough</li> <li>• Nausea</li> <li>• Vomiting</li> </ul>                                                                            | 1 | Daily activity minimally affected, with or without treatment |
|                                                                       |                                                                                                                                                                                                                                                            | 2 | Daily activity possible but only with treatment              |
|                                                                       |                                                                                                                                                                                                                                                            | 3 | Daily activity not possible even with                        |



|  |                                                                                                                                                                     |  |           |
|--|---------------------------------------------------------------------------------------------------------------------------------------------------------------------|--|-----------|
|  | <ul style="list-style-type: none"> <li>• Abdominal pain</li> <li>• Diarrhea</li> <li>• Chest pain</li> <li>• Palpitations</li> <li>• Shortness of breath</li> </ul> |  | treatment |
|--|---------------------------------------------------------------------------------------------------------------------------------------------------------------------|--|-----------|

**Definitely Related** – The investigational product is the only plausible etiology.

**Probably Related** – The investigational product is the most plausible etiology, but there is at least one other etiology that is reasonably likely.

**Possibly Related** – The investigational product is not the most plausible etiology, but is still reasonably likely.

**Unlikely to be related** – The investigational product is unlikely to be the cause, but cannot be completely ruled out due to the existence of plausible theoretical mechanisms linking the investigational product to the adverse event.

**Not Related** – There is no plausible theoretical mechanism whereby the investigational product could have caused the adverse event

**Supplemental Table 7: Severity grading scale for biochemistry and hematology.**

| <b>TOXICITY GRADING SCALE FOR GRADING CLINICAL LABORATORY PARAMETERS; HEALTHY ADULT AND ADOLESCENT VOLUNTEERS (11-65 YEARS OLD)</b> |               |                      |                     |                      |                           |                         |                                               |
|-------------------------------------------------------------------------------------------------------------------------------------|---------------|----------------------|---------------------|----------------------|---------------------------|-------------------------|-----------------------------------------------|
| <b>HEMATOLOGY PARAMETERS</b>                                                                                                        | <b>Source</b> | <b>Units</b>         | <b>Normal range</b> | <b>Mild (Grade1)</b> | <b>Moderate (Grade 2)</b> | <b>Severe (Grade 3)</b> | <b>Potentially life Threatening Grade (4)</b> |
| Hemoglobin (Male) <sup>1</sup>                                                                                                      | Local         | g/dL                 | 12 - 17.4           | <12-8.0              | <8.0 – 7.0                | <7.0 – 4.0              | <4.0                                          |
| Hemoglobin (Female) <sup>2</sup>                                                                                                    | Local         | g/dL                 | 9.6 - 14.1          | <9.6 – 8.0           |                           |                         |                                               |
| Leukocyte count (WBC) Increase <sup>1</sup>                                                                                         | Local         | x10 <sup>3</sup> /μL | 3.65 - 9.7          | >9.7 - 15            | >15 - 20                  | >20 - 25                | > 25                                          |
| Leukocyte count (WBC) Decrease <sup>1</sup>                                                                                         | Local         | x10 <sup>3</sup> /μL | 3.65 - 9.7          | <3.65 - 2.5          | <2.5 - 1.5                | <1.5 - 1                | < 1                                           |
| Lymphocytes Decrease <sup>2</sup>                                                                                                   | Local         | x10 <sup>3</sup> /μL | 1.19 - 3.4          | <1.19 - 0.75         | <0.75 - 0.5               | < 0.5 - 0.25            | < 0.25                                        |
| Neutrophils Decrease <sup>1</sup>                                                                                                   | Local         | x10 <sup>3</sup> /μL | 1.61-5.69           | <1.61 - 0.9          | < 0.9 - 0.6               | < 0.6 - 0.4             | <0.4                                          |
| Eosinophils - cell/mm <sup>3</sup> ( <sup>2</sup> )                                                                                 | Local         | x10 <sup>3</sup> /μL | 0 - 0.78            | > 0.78 - 1.5         | >1.5 - 5                  | > 5                     | Hypereosinophilic                             |
| Platelets Decreased <sup>1</sup>                                                                                                    | Local         | x10 <sup>3</sup> /μL | 124-312             | 75 - <124            | 50 - <75                  | 25 – <50                | < 25                                          |

| <b>TOXICITY GRADING SCALE FOR GRADING CLINICAL LABORATORY PARAMETERS; HEALTHY ADULT AND ADOLESCENT VOLUNTEERS (11-65 YEARS OLD)</b> |                    |              |                     |                      |                           |                         |                                               |
|-------------------------------------------------------------------------------------------------------------------------------------|--------------------|--------------|---------------------|----------------------|---------------------------|-------------------------|-----------------------------------------------|
| <b>BIOCHEMISTRY PARAMETERS</b>                                                                                                      | <b>Data Source</b> | <b>Units</b> | <b>Normal range</b> | <b>Mild (Grade1)</b> | <b>Moderate (Grade 2)</b> | <b>Severe (Grade 3)</b> | <b>Potentially life Threatening Grade (4)</b> |
| Glucose – Hypoglycemia <sup>2</sup>                                                                                                 | LOCAL              | mg/dL        | 70-109              | 64- <70              | 56- <64                   | 45- <56                 | <45                                           |
| Random Glucose – Hyperglycemia <sup>2</sup>                                                                                         | LOCAL              | mg/dL        | 70-109              | >109-126.0           | >126-198                  | > 198                   | Insulin requirement or hyperosmolar coma      |
| Creatinine <sup>6</sup>                                                                                                             | LOCAL              | mg/dL        | 0.54-1.11           | >1.11-1.70           | >1.70-2.0                 | >2.0-2.5                | > 2.5 or require dialysis                     |
| Albumin – Hypoalbuminemia <sup>2</sup>                                                                                              | LOCAL              | g/L          | 42.7 - 60           | 28 - < 42.7          | 25 - < 28                 | < 25                    | ∞                                             |
| Total Protein – Hypoproteinemia Saathof, et al. <sup>5</sup>                                                                        | LOCAL              | g/L          | 67.2 - 85.2         | 55 - <67.2           | 50 - < 55                 | < 50                    | ∞                                             |
| Alkaline Phosphatase <sup>5</sup>                                                                                                   | LOCAL              | U/L          | 45- 186.9           | > 186.9 – 356.9      | >356.9 – 526.9            | >526.9- 1700            | >1700                                         |
| Alanine aminotransferase <sup>6</sup>                                                                                               | LOCAL              | U/L          | 0 - 45              | >45 – 106.5          | >106.5 – 209              | >209 - 410              | >410                                          |
| Aspartate aminotransferase <sup>5</sup>                                                                                             | LOCAL              | U/L          | 15.2 – 58.7         | >58.7-138.8          | >138.8-272.3              | >272.3-534              | >534                                          |
| Bilirubin – when                                                                                                                    | LOCAL              | mg/dL        | 0.18-1.82           | >1.82-2.27           | >2.27-2.73                | >2.73-3.18              | >3.18                                         |

|  |                                                                 |       |       |        |            |            |             |       |
|--|-----------------------------------------------------------------|-------|-------|--------|------------|------------|-------------|-------|
|  | accompanied by any increase in Liver Function Test <sup>2</sup> |       |       |        |            |            |             |       |
|  | Bilirubin – when Liver Function Test is normal <sup>5</sup>     | LOCAL | mg/dL | 0-2.62 | >2.62-3.01 | >3.01-3.61 | >3.612-4.19 | >4.19 |

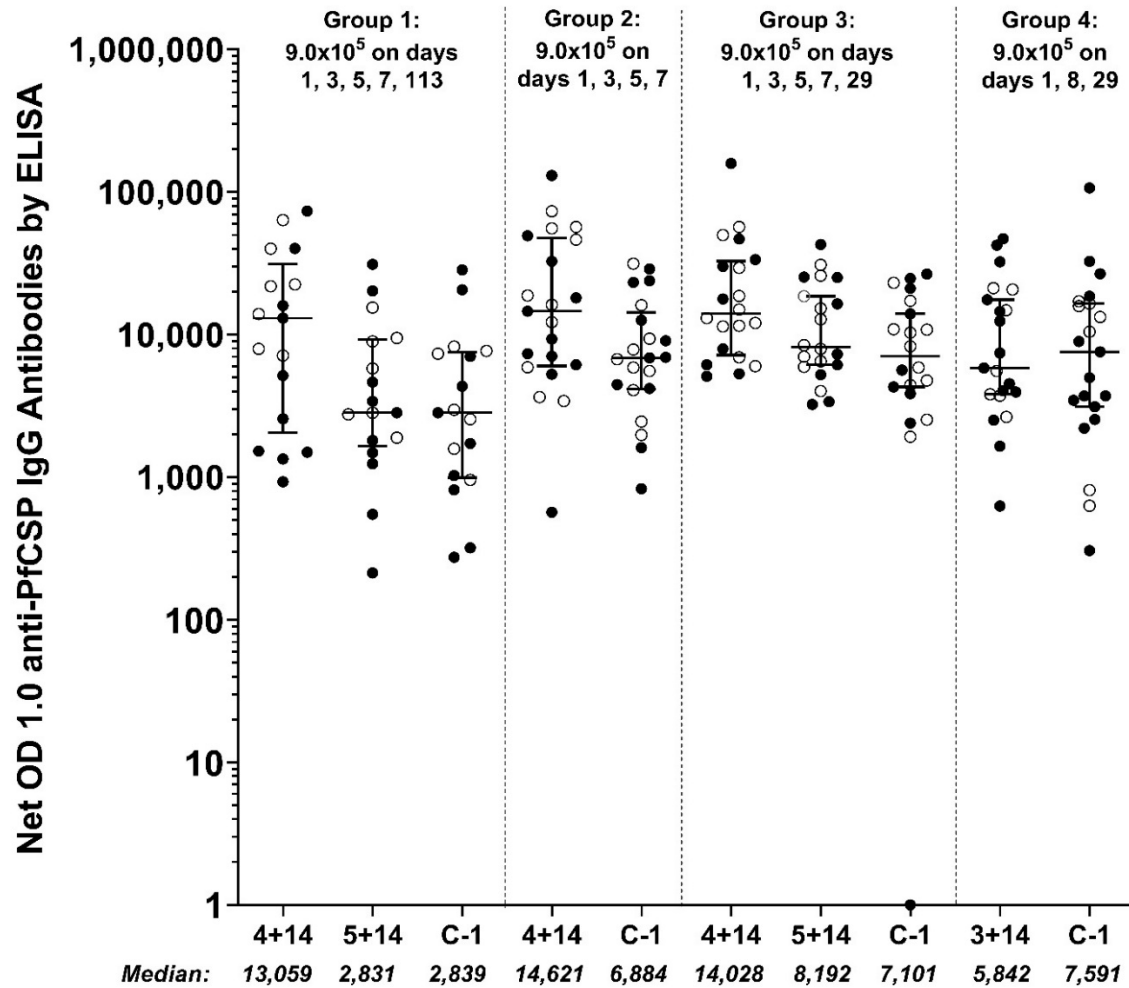

**Supplemental Figure 1. PfCSP IgG Kinetics.** Each point represents a subject infected (○) or not infected (●) after CHMI. For groups 1, 2 and 3 the highest antibody levels were achieved after the 4<sup>th</sup> dose (4+14), with no increase in antibody levels in groups 1 and 3 with a 5<sup>th</sup> dose (5+14). For subjects receiving a delayed final dose (groups 1, 3 and 4) there was little decline in antibody level prior to CHMI 4-5 weeks later (C-1).
